# Supplementary material
Source: PubMed Central journal article supplement (PMC5997775)
Supplement: NIHMS972833-supplement-supplemental_table_1.pdf [file NIHMS972833-supplement-supplemental_table_1.pdf]

Supplementary Table 1. ODNs for sgRNA plasmids used in Anticipated Results section.

| <b>ODN name</b> | <b>Sequence</b>          | <b>Purpose</b>                                                                                 |
|-----------------|--------------------------|------------------------------------------------------------------------------------------------|
| MAFB_sgRNA1a    | CACCGCTCGCTTCAGCGATGGCCG | MAFB protospacer for ligation into pSMART-sgRNA plasmid (top strand). Relates to Figure 3.     |
| MAFB_sgRNA1a    | AAACCGGCCATCGCTGAAGCGAGC | MAFB protospacer for ligation into pSMART-sgRNA plasmid (bottom strand). Relates to Figure 3.  |
| HNF4A_sgRNA1a   | CACCGCTTCTTCTGGAGGAGCGTG | HNF4A protospacer for ligation into pSMART-sgRNA plasmid (top strand). Relates to Figure 4.    |
| HNF4A_sgRNA1b   | AAACCACGCTCCTCCAGAAGAAGC | HNF4A protospacer for ligation into pSMART-sgRNA plasmid (bottom strand). Relates to Figure 4. |
| H3F3A_sgRNA1a   | CACCGTTTAATACCTGTAACGATG | H3F3A protospacer for ligation into pSMART-sgRNA plasmid (top strand). Relates to Figure 5.    |
| H3F3A_sgRNA1b   | AAACCATCGTTACAGGTATTAAC  | H3F3A protospacer for ligation into pSMART-sgRNA plasmid (bottom strand). Relates to Figure 5. |
